# Supplementary material for: Neonatal Morbidities and Feeding Tolerance Outcomes in Very Preterm Infants, before and after Introduction of Probiotic Supplementation
Source: MDPI journal article supplement (doi:10.3390/nu14173646), 2022-09-03
Supplement: s1 [file s1]

**Table S1. Characteristics of 180 very preterm infants born in Stockholm, of which 139 received probiotics per the new guideline while 41 infants were eligible but were not supplemented.**

|                                                   | No probiotics<br>( <i>n</i> = 41) | Probiotics<br>( <i>n</i> = 139) | p-value |
|---------------------------------------------------|-----------------------------------|---------------------------------|---------|
| <b>Perinatal characteristics<sup>a</sup></b>      |                                   |                                 |         |
| Gestational age, weeks (SD)                       | 30.5 (1.0)                        | 30.2 (1.1)                      | 0.10    |
| Birth weight, Fenton Z-score                      | -0.06 (0.9)                       | 0.02 (0.8)                      | 0.70    |
| Birth weight for gestational age, n (%)           |                                   |                                 |         |
| Appropriate                                       | 36 (87.8)                         | 122 (87.8)                      | 0.92    |
| Large                                             | 1 (2.4)                           | 5 (3.6)                         |         |
| Small                                             | 4 (9.8)                           | 12 (8.6)                        |         |
| Male, n (%)                                       | 22 (53.7)                         | 68 (48.9)                       | 0.59    |
| Singleton, n (%)                                  | 34 (82.9)                         | 100 (71.9)                      | 0.16    |
| Vaginal delivery, n (%)                           | 9 (21.9)                          | 42 (30)                         | 0.34    |
| Apgar score < 7 at 5 minutes <sup>b</sup> , n (%) | 8 (20.5)                          | 18 (13.0)                       | 0.25    |
| Transient tachypnea, n (%)                        | 16 (39.0)                         | 60 (43.2)                       | 0.64    |
| RDS, n (%)                                        | 20 (48.7)                         | 56 (40.3)                       | 0.33    |
| Invasive ventilation <sup>c</sup> , days (SD)     | 2.7 (3.6)                         | 2.4 (2.6)                       | 0.82    |
| CPAP/HFNC <sup>d</sup> , days (SD)                | 12.6 (12.1)                       | 13.4 (14.6)                     | 0.78    |
| BPD, n (%)                                        | 1 (2.4)                           | 4 (2.9)                         | 0.88    |
| PDA, n (%)                                        | 0 (0.0)                           | 4 (2.9)                         | 0.27    |

<sup>a</sup> presented as mean value and standard deviation, or number of infants and proportion

<sup>b</sup> missing data *n* = 3

<sup>c</sup> based on 9 and 19 infants needing any invasive ventilation in the No probiotics and Probiotics groups, respectively

<sup>d</sup> based on 37 and 128 infants needing CPAP and/or HFNC in the No probiotics and Probiotics groups, respectively

**Table S2. Rates and risks of the composite outcome of death, sepsis, and/or surgical NEC, in 345 very preterm infants**

|                                                                     | No probiotics<br>(N = 206) | Probiotics<br>(N = 139) | Crude RR [95% CI]  | Adjusted RR <sup>a</sup> [95% CI] |
|---------------------------------------------------------------------|----------------------------|-------------------------|--------------------|-----------------------------------|
| Composite outcome of death,<br>sepsis and/or surgical NEC, n<br>(%) | 16 (7.8)                   | 5 (3.6)                 | 0.46 [0.17 – 1.23] | 0.44 [0.17 – 1.15]                |
| Single outcomes of death,<br>sepsis or surgical NEC, n (%)          |                            |                         |                    |                                   |
| - Death                                                             | 2 (1.0)                    | 0 (0)                   | -                  | -                                 |
| - Sepsis                                                            | 15 (7.2)                   | 5 (3.6)                 | 0.49 [0.18 – 1.33] | 0.46 [0.17 – 1.23]                |
| - Surgical NEC                                                      | 3 (1.5)                    | 1 (0.7)                 | 0.49 [0.05 – 4.70] | 0.48 [0.05 – 4.53]                |

<sup>a</sup> risks adjusted for gestational age (days) and birth weight (Fenton Z-score)
